# Supplementary material for: Using the Lives Saved Tool (LiST) to Model mHealth Impact on Neonatal Survival in Resource-Limited Settings
Source: PLoS One. 2014 Jul 11;9(7):e102224. doi: 10.1371/journal.pone.0102224 (PMC4094557; doi:10.1371/journal.pone.0102224)
Supplement: File S2 — LiST Data Sources for the Modeling Analyses. (XLSX) [file pone.0102224.s002.xlsx]

## Sheet: LiST Inputs
	Table 2.
	Caption/headline: LiST Interventions and Coverage Increase Scenarios in Bangladesh and Uganda (input parameters of baseline year in 2011 and target year in 2015)
	SOURCE: LiST
	LiST Interventions (selected)			Bangladesh				Uganda
				Baseline (2011)	Projected coverage increase (2015)			Baseline (2011)	Projected coverage increase (2015)
					0.1	0.3	0.5		0.1	0.3	0.5
	Pregnancy	Antenatal care (ANC 4+)		25.5	28.1	33.2	38.3	47.6	52.4	61.9	71.4
	Childbirth	Skilled birth attendance*		31.7	34.8	41.2	47.6	58	63.8	75.4	87
		Facility delivery* (Clinic and Hospital)		28.8	31.7	37.4	43.2	57.4	63.1	74.6	86.1
		Home deliveries** (% of all deliveries)	Unassisted deliveries**	68.3	65.2	58.8	52.4	42	36.2	24.6	13
			Assisted deliveries at home**	2.9	3.1	3.8	4.4	0.6	0.7	0.8	0.9
		Facility deliveries** (% of all deliveries)	Essential care**	25.9	15.8	18.7	21.6	14.3	15.8	18.6	21.5
			BEmOC**	0	9.5	11.2	13	8.6	9.5	11.2	12.9
			CEmOC**	2.9	6.3	7.5	8.6	34.4	37.9	44.8	51.7
	Breastfeeding promotion and prevalence (<1 month)	Promotion of breastfeeding		36.3	39.9	47.2	54.5	34.8	38.3	45.2	52.2
		Exclusive breastfeeding**		84.5	84.9	85.6	86.3	89.9	90.1	90.6	91
		Predominant breastfeeding**		5.9	5.7	5.5	5.2	5	4.9	4.7	4.4
		Partial breastfeeding**		9.6	9.4	9	8.5	5.1	5	4.8	4.5
	Preventive	Preventive postnatal care (Thermal care, Clean postnatal practice)		29.6	32.6	38.5	44.4	2.8	3.1	3.6	4.2
	Notes: For detailed definitions and data sources, see LiST manuals and published articles[53,58][67];baseline coverage data were compiled from Demographic and Health Surveys (DHS: Uganda and Bangladesh, 2011); Multiple Indicator Cluster Survey (MICS Round 3: Bangladesh, 2006). *Coverage measure of SBA includes coverage measure of FD. Thus we modeled coverage increase for SBA and FD simultaneously…
	Antenatal care (ANC4+): Percent of pregnant women with at least 4 antenatal care visits during their pregnancy. The intervention includes Routine (TT, IPTp, Syphilis detection and treatment), Nutritional (Calcium supplementation), Case management (Diabetes, Management of pre-eclampsia), Other (Fetal growth restriction detection and management) This analysis does not include iron-folic acid. Data …
	Skilled Birth Attendance (SBA): Percent of children born who are attended by a skilled attendance, including doctors, nurses, midwives- in a facility or home. An SBA in the home is defined as a skilled birth attendant who deliveries the infant at home without benefit of referral to a facility in case of emergency. An SBA in a facility is defined as a medically skilled attendant who has the abilit…
	s Unassisted deliveries: Percent of deliveries without skilled attendance in the home.
	s Assisted deliveries at home: Percent of deliveries with a skilled attendant in the home.
	s Essential care: Percent of deliveries including monitoring labor progress with a partograph, detection of complications and infection control via a clean delivery, Episiotomy is available, if needed. For the neonate, this includes routine care practices including: immediate drying, skin-to-skin contact or immediate wrapping for thermal care and clean cord cutting.
	s BEmOC (Basic Emergency Obstetric Care): Percent of deliveries at a health center and covers case management of direct obstetric complications. The intervention includes: Case management of ante-partum hemorrhage, prolonged/obstructed labor, post-partum hemorrhage and severe infection. Methods include: shock management, pain relief, ABC, IV fluids, instrumental delivery and manual removal of the…
	s CEmOC (Comprehensive Emergency Obstetric Care) : Percent of deliveries at a hospital and covers case management of direct obstetric complications. In addition to including all interventions in Basic Emergency Obstetric Care, additional methods include: ultrasound, culdocentesis, induction, laparotomy, salpingectomy, blood transfusion, caesarian section, hysterectomy, symphisiotomy, balloon tamp…
	* Users can change any of the assumptions in the LiST by simply uncheck the box ‘Allow LiST to calculate place and level of delivery’ to allow direct entry of these values. The sum of all five delivery levels must be no more than 100%. Note that the values listed assume the highest level of care that is available for that particular delivery. So the percent of deliveries with essential care selec…
	Exclusive breastfeeding (BF): Percent of children 0-11 months receiving only breast milk for food (plus medication, vaccines, and vitamins).
	Preventative postnatal care (PNC): Percent of infants with a postnatal health contact/visit within 2 days of birth.

## Sheet: LiST Outputs
	Table 3.
	Caption/headline: Neonatal Mortality Impact by Various MNH Interventions and Coverage Scenarios in Bangladesh and Uganda in 2015
	SOURCE: LiST
	Interventions	Illustrative mHealth Strategies	Relative Coverage increase by 2015	Projected number of neonatal lives saved
				Bangladesh				Uganda
				2012	2013	2014	2015	2012	2013	2014	2015
	ANC	Data collection and management (eg. Risk assessment and classification, Vital events tracking, adherence reminder); SMS texting for health promotion and scheduled visits reminder	0.1	0	0	0	0 (1)***	1	2	3	5 (0.8)
			0.3	0	1	1	1 (1)	3	7	10	14 (0.79)
			0.5	0	1	2	2 (1)	5	11	17	23 (0.78)
	SBA/FD	Emergency medical referral (eg. referral calling)	0.1	1038	2055	3048	4016 (0.74)	381	776	1187	1611 (0.76)
			0.3	1530	3021	4470	5877 (0.74)	1141	2312	3512	4738 (0.76)
			0.5	2021	3984	5882	7717 (0.74)	1892	3811	5753	7714 (0.75)
	BF	SMS texting for health promotion	0.1	4	8	12	16 (0.75)	2	3	5	7 (0.71)
			0.3	12	24	36	48 (0.75)	5	8	14	18 (0.72)
			0.5	20	41	61	80 (0.75)	8	16	26	35 (0.77)
	PNC	SMS texting for health promotion (and scheduled visits reminder)	0.1	98	194	289	383 (0.74)	0	6	12	17 (1)
			0.3	290	576	858	1135 (0.74)	0	15	30	47 (1)
			0.5	482	958	1427	1888 (0.74)	0	26	54	83 (1)
	BF & PNC	SMS texting for health promotion (and scheduled visits reminder)	0.1	102	202	301	399 (0.74)	5	11	18	24 (0.79)
			0.3	302	600	894	1183 (0.74)	16	32	50	68 (0.76)
			0.5	502	999	1487	1968 (0.74)	27	56	86	118 (0.77)
	All-combined: ANC,SBA/FD, BF &PNC	Data collection and management (eg. Risk assessment and classification, Vital events tracking, adherence reminder); SMS texting for health promotion and scheduled visits reminder; Emergency medical referral (eg. referral calling)	0.1	1141	2258	3346	4405 (0.74)	388	790	1208	1639 (0.76)
			0.3	1820	3587	5298	6951 (0.74)	1160	2349	3569	4814 (0.76)
			0.5	2512	4934	7262	9496 (0.74)	1924	3874	5847	7839 (0.75)
	Note: ( )*** is percentage change in NMR from baseline in 2011 to 2015.

## Sheet: LiST_causes of deaths
	File S2.
	Caption/headline: Causes of Neonatal Deaths at Baseline in 2011 and Estimated Causes of Neonatal Deaths Averted (with 50% coverage scenario) in 2015 in Bangladesh and Uganda
	SOURCE: LiST
	Coverage increase by 2015	Causes of Neonatal Deaths Avered (2015)
		ANC (50%)		SBA/FD (50%)		BF (50%)		PNC (50%)		BF & PNC (50%)		All-combined: ANC,SBA/FD, BF &PNC (50%)
		Bangladesh	Uganda	Bangladesh	Uganda	Bangladesh	Uganda	Bangladesh	Uganda	Bangladesh	Uganda	Bangladesh	Uganda
	Neonatal-Diarrhea	0	0	0	0	17	13	0	0	17	13	17	13
	Neonatal-Sepsis	2	23	625	665	0	0	787	40	787	40	1372	723
	Neonatal-Pneumonia	0	0	0	0	63	22	0	0	63	22	63	22
	Neonatal-Asphyxia	0	0	2382	3693	0	0	0	0	0	0	2382	3693
	Neonatal-Prematurity	0	0	4692	3338	0	0	1082	41	1082	41	5627	3370
	Neonatal-Tetanus	0	0	17	18	0	0	19	1	19	1	35	19
	Neonatal-Cogenital anomalies	0	0	0	0	0	0	0	0	0	0	0	0
	Neonatal-Other	0	0	0	0	0	0	0	0	0	0	0	0
	Causes of Neonatal Deaths at Baseline (2011)	Bangaldesh	Uganda
	Neonatal-Diarrhea	506	441
	Neonatal-Sepsis	12011	5703
	Neonatal-Pneumonia	3662	1539
	Neonatal-Asphyxia	18269	8793
	Neonatal-Prematurity	35260	11746
	Neonatal-Tetanus	293	124
	Neonatal-Cogenital anomalies	6005	1618
	Neonatal-Other	3169	1233

## Sheet: LiST_effectiveness
	File S2.
	Caption/headline: Effectiveness of Interventions , Affected Fractions, and Assumptions to Neonatal Mortality in Bangladesh and Uganda
	SOURCE: LiST
	Intervention			Effectiveness (<1month)	Affected fraction
	Neonatal-Diarrhea	Curative after birth	ORS-oral rehydration solution	0.93	1
	Neonatal-Sepsis	Pregnancy	Syphillis detection and treatment	0.97	0.006
		Preventive	Clean postnatal practice	0.4	1
			Chlorhexidine	0.23	1
		Curative after birth	Oral antibiotics	0.28	1
			Injectable antibiotics	0.65	1
			Full supportive care	0.8	1
	Neonatal-Pneumonia	Curative after birth	Oral antibiotics	0.42	1
			Injectable antibiotics	0.75	1
			Full supportive care	0.9	1
	Neonatal-Asphyxia	Curative after birth	Full supportive care	0.05	1
	Neonatal-Prematurity	Preventive	Thermal care	0.2	1
		Curative after birth	KMC-Kangaroo mother care	0.51	1
			Full supportive care	0.28	1
	Neonatal-Tetanus	Pregnancy	TT-Tetanus toxiod vaccination	0.94	1
		Preventive	Clean postnatal practice	0.4	1
	Neonatal-Cogenital anomalies	Periconceptual	Folic acid supplementation/fortification	0.35	1
	Neonatal-Other	Curative after birth	Full supportive care	0.1	1
	Additional Nutritional Assumptions		Relative risk (<1month)
	Neonatal-Diarrhea	Exclusive breastfeeding	1
		Predominant breastfeeding	2.28
		Partial breastfeeding	4.62
		Not breastfeeding	10.53
	Neonatal-Sepsis	Exclusive breastfeeding	1
		Predominant breastfeeding	1.66
		Partial breastfeeding	2.5
		Not breastfeeding	14.97
	Neonatal-Pneumonia	Exclusive breastfeeding	1
		Predominant breastfeeding	1.66
		Partial breastfeeding	2.5
		Not breastfeeding	14.97
	Neonatal Intervention Delivery		Effectiveness					Affected fraction
			Unassisted delivery	Assited delivery at home (SBA)	Essential care	BEmOC	CEmOC	All deliveries
	Neonatal-Diarrhea	n/a
	Neonatal-Sepsis	Clean birth practice	0.15	0.23	0.27	0.27	0.27	1
		Antibiotics for pPRoM	0	0	0.08	0.08	0.08	1
	Neonatal-Pneumonia	n/a
	Neonatal-Asphyxia	Immediate assessment and stimulation	0.1	0.1	0.1	0.1	0.1	1
		Labor and delivery management	0	0.25	0.25	0.4	0.85	1
		Neonatal resuscitation	0	0.2	0.3	0.3	0.3	1
	Neonatal-Prematurity	Immediate assessment and stimulation	0.1	0.1	0.1	0.1	0.1	1
		Labor and delivery management	0	0.1	0.1	0.1	0.1	1
		Neonatal resuscitation	0	0.05	0.1	0.1	0.1	1
		Antenatal corticosteroids for preterm labor		0	0.53	0.53	0.53	1
		Antibiotics for pPRoM		0	0.12	0.12	0.12	1
	Neonatal-Tetanus	Clean birth practice	0.3	0.35	0.38	0.38	0.38	1
	Neonatal-Cogenital anomalies	n/a
	Neonatal-Other	n/a
	Additional Nutritional Assumptions		Odds ratio
	Promotion on exclusive breastfeeding in the neonatal period		2.3

## Sheet: Individual scenarios graphs
	Figure S2-1.
	Caption/headline: Neonatal Mortality Impact by Various MNH Interventions and Coverage Scenarios in Bangladesh and Uganda in 2015
	SOURCE: LiST
	Individual scenarios
	Bangladesh		2012	2013	2014	2015	Uganda		2012	2013	2014	2015
	ANC	0.1	0	0	0	0	ANC	0.1	1	2	3	5
		0.3	0	1	1	1		0.3	3	7	10	14
		0.5	0	1	2	2		0.5	5	11	17	23
	SBA/FD	0.1	1038	2055	3048	4016	SBA/FD	0.1	381	776	1187	1611
		0.3	1530	3021	4470	5877		0.3	1141	2312	3512	4738
		0.5	2021	3984	5882	7717		0.5	1892	3811	5753	7714
	BF	0.1	4	8	12	16	BF	0.1	2	3	5	7
		0.3	12	24	36	48		0.3	5	8	14	18
		0.5	20	41	61	80		0.5	8	16	26	35
	PNC	0.1	98	194	289	383	PNC	0.1	0	6	12	17
		0.3	290	576	858	1135		0.3	0	15	30	47
		0.5	482	958	1427	1888		0.5	0	26	54	83
	BF+PNC	0.1	102	202	301	399	BF+PNC	0.1	5	11	18	24
		0.3	302	600	894	1183		0.3	16	32	50	68
		0.5	502	999	1487	1968		0.5	27	56	86	118
	All-combined (ANC+SBA/FD+BF+PNC)	0.1	1141	2258	3346	4405	All-combined (ANC+SBA/FD+BF+PNC)	0.1	388	790	1208	1639
		0.3	1820	3587	5298	6951		0.3	1160	2349	3569	4814
		0.5	2512	4934	7262	9496		0.5	1924	3874	5847	7839

## Sheet: Combined scenarios graghs
	Figure S2-2.
	Caption/headline: Neonatal Mortality Impact by Various MNH Interventions and Coverage Scenarios in Bangladesh and Uganda in 2015
	SOURCE: LiST
	Combined scenarios
	Bangladesh		2012	2013	2014	2015	Uganda		2012	2013	2014	2015
	BF+PNC	0.1	102	202	301	399	BF+PNC	0.1	5	11	18	24
		0.3	302	600	894	1183		0.3	16	32	50	68
		0.5	502	999	1487	1968		0.5	27	56	86	118
	All-combined	0.1	1141	2258	3346	4405	All-combined	0.1	388	790	1208	1639
		0.3	1820	3587	5298	6951		0.3	1160	2349	3569	4814
		0.5	2512	4934	7262	9496		0.5	1924	3874	5847	7839
